# Supplementary material for: P-doped SnFe nanocubes decorated with PdFe alloy nanoparticles for ethanol fuel cells
Source: Royal Society of Chemistry journal article supplement (doi:10.1039/d0ta12120g), 2021-01-01
Supplement: d0ta12120g1.pdf [file d0ta12120g1.pdf]

## Supplementary Information

### **P-doped SnFe nanocubes decorated with PdFe alloy nanoparticles for ethanol fuel cells**

Dimpul Konwar<sup>†</sup>, Padmini Basumatary<sup>†</sup>, UnHo Lee, and Young Soo Yoon\*

Department of Materials Science and Engineering, Gachon University, Bokjung-dong,  
Seongnam-si, Gyeonggi-Do, 1342, Republic of Korea

---

\*Corresponding author. Y. S. Yoon

Tel. +82 10 8766 5558; Fax: +82 31 750 8988.

*E-mail:* benedicto@gachon.ac.kr

<sup>†</sup>Both authors contributed equally.

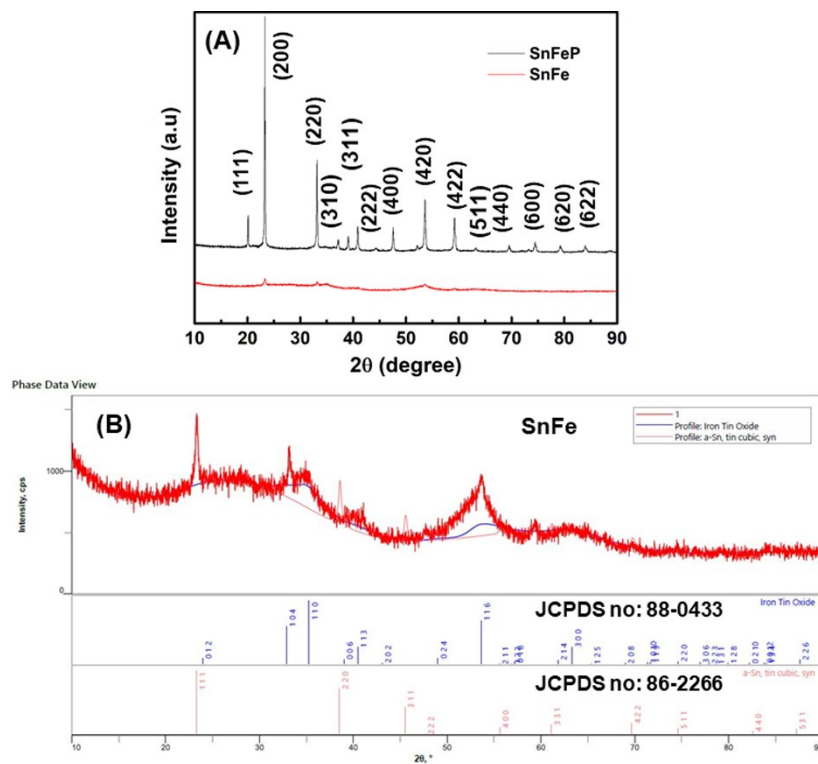

**Fig. S1.** XRD pattern of (A) SnFeP and SnFe. (B) Peak fitting of SnFe.

**Table ST1.** Particle sizes and crystallographic data of the as-prepared catalysts.

| Catalysts     | 2 $\theta$<br>(220)<br>peak | 2 $\theta$<br>(111)<br>peak | $\epsilon$ (nm) | D <sup>[c]</sup> (nm) | $\eta$ <sup>[d]</sup> | $\eta$ <sup>[d]</sup> (%) |
|---------------|-----------------------------|-----------------------------|-----------------|-----------------------|-----------------------|---------------------------|
| SnFe          | 34.04                       | –                           | 0.5714          | 4.62                  | -0.0225               | -2.25                     |
| SnFeP         | 33.14                       | –                           | 0.5399          | 7.23                  | -0.0764               | -7.64                     |
| SnFeP@rGO     | 33.11                       | –                           | 0.5260          | 6.89                  | -0.1002               | -10.02                    |
| PdFe/rGO      | –                           | 40.13                       | 0.3703          | 3.21                  | -0.0483               | -4.83                     |
| PdFe/SnFeP@rG | –                           | 40.05                       | 0.3435          | 2.26                  | -0.1171               | -11.71                    |
| <b>O</b>      |                             |                             |                 |                       |                       |                           |
| Pd/SnFeP@rGO  | –                           | 40.10                       | 0.3785          | 2.84                  | -0.0272               | -2.72                     |
| Pd/rGO        | –                           | 39.11                       | 0.3983          | 3.67                  | +0.0236               | +2.36                     |

$\epsilon$  is the lattice constant value of face-centered cubic (fcc) structure of the crystals, D<sup>[c]</sup> is the average crystallite size obtained from XRD pattern using Scherrer equation ( $D = 0.9\lambda / \beta \cos \theta$ ), and  $\eta$ <sup>[d]</sup> is the lattice strain as

calculated from Equation:  $\eta = (\epsilon - \epsilon_0) / \epsilon_0$ . Where  $\epsilon$  is the lattice constant of Pd alloys in the catalysts, and  $\epsilon_0$  is the lattice constant of bulk Pd (0.3891 nm). On the other hand, the  $\epsilon_0$  for Sn is 0.5846 nm.

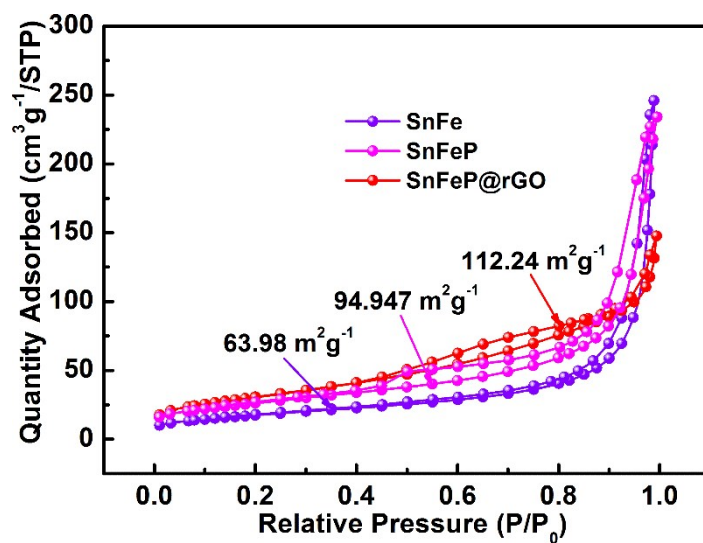

**Fig. S2.** N<sub>2</sub> adsorption/desorption isotherms of SnFe, SnFeP, and SnFeP@rGO catalysts.

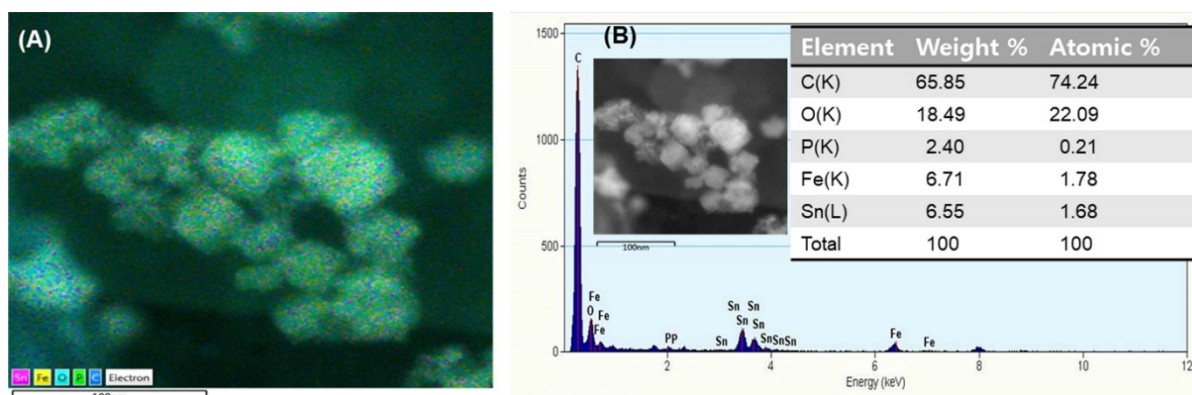

**Fig. S3.** (A) Elemental mapping, and (B) EDS spectra and composition of SnFeP@rGO.

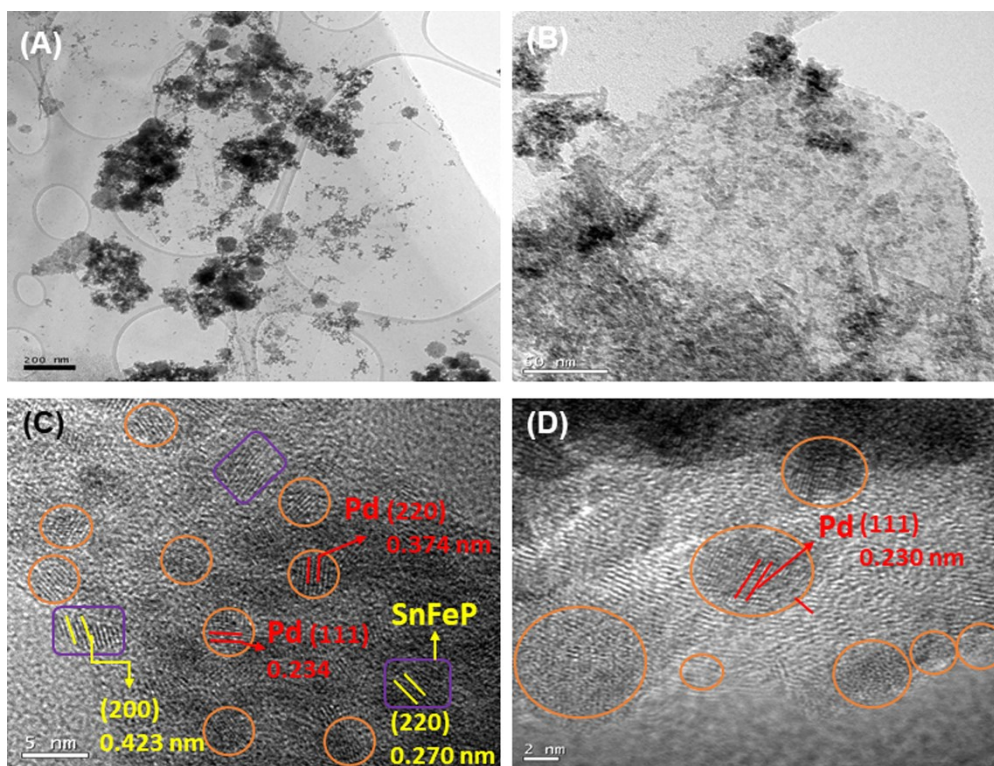

**Fig. S4.** TEM images of (A) Pd/SnFeP@rGO and (B) Pd/rGO. HR-TEM image of (C) Pd/SnFeP@rGO and (D) Pd/rGO. The scale bar in (B) is 50 nm.

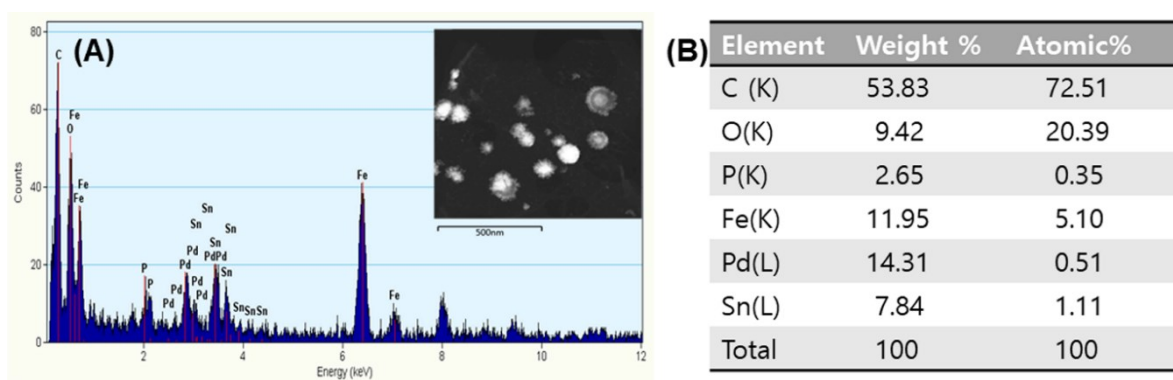

**Fig. S5.** (A) EDS data of PdFe/SnFeP@rGO anode catalysts.

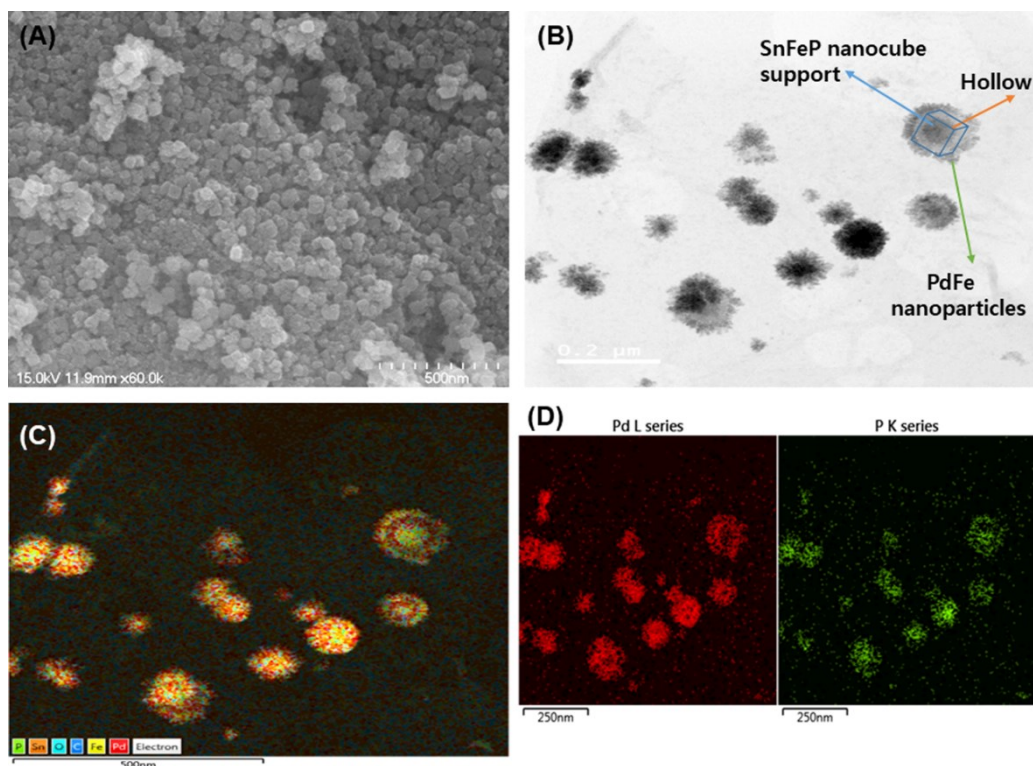

**Fig. S6.** (A) SEM, (B) TEM image, and (C,D) HAADF-STEM elemental mapping of PdFe/SnFeP@rGO catalyst (repetition of catalyst preparation). (Using SEM, Hitachi S-4200, Japan).

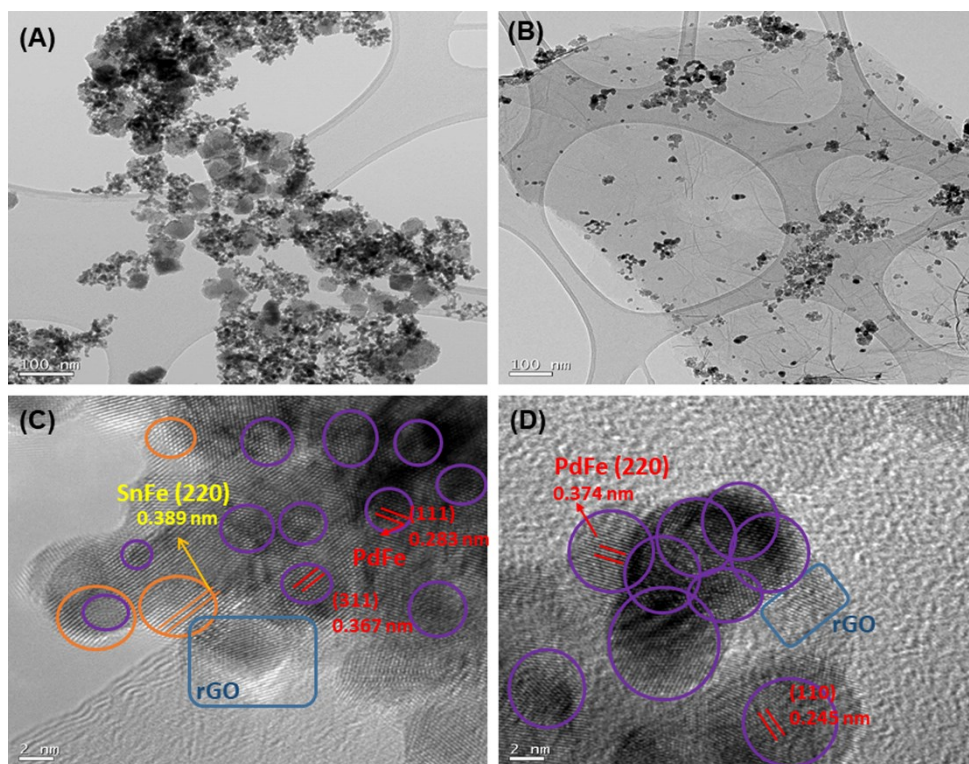

**Fig. S7.** TEM images of (A,C) PdFe/SnFe@rGO, and (B, D) PdFe/rGO anode catalysts.

**Table ST2.** Binding energies of Pd based catalysts under XPS investigation.

| Catalyst           | Binding Energy (eV) |                  |                     |                  |
|--------------------|---------------------|------------------|---------------------|------------------|
|                    | Pd3d <sub>5/2</sub> |                  | Pd3d <sub>3/2</sub> |                  |
|                    | Pd <sup>0</sup>     | Pd <sup>2+</sup> | Pd <sup>0</sup>     | Pd <sup>2+</sup> |
| PdFe/SnFeP@rG<br>O | 334.90              | 336.50           | 340.19              | 341.71           |
| PdFe/rGO           | 334.52              | 336.12           | 339.81              | 341.33           |
| Pd/C               | 334.35              | 335.95           | 339.64              | 341.16           |

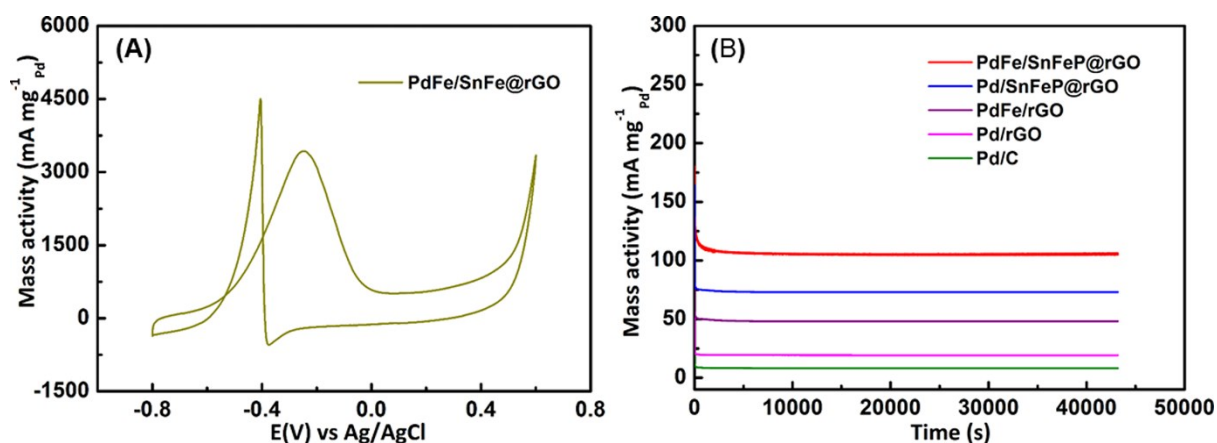

**Fig. S8.** (A) Mass activity of PdFe/SnFe@rGO catalyst in 0.5 M KOH and 0.3 M ethanol aqueous solution. Scan rate of 10 mVs<sup>-1</sup>. (B) Chronoamperometric data recorded at 0.1 V vs. Ag/AgCl in 0.5 M KOH solution for 12 h.

**Table ST3.** Summary of catalytic activity with different as-synthesized anode catalysts.

| Catalysts      | $E_{\text{onset}}$ (V vs. Ag/AgCl) | ECSA (m <sup>2</sup> g <sup>-1</sup> ) | Mass activity (mA mg <sup>-1</sup> <sub>Pd</sub> ) | Specific activity (mA cm <sup>-2</sup> ) |
|----------------|------------------------------------|----------------------------------------|----------------------------------------------------|------------------------------------------|
| PdFe/SnFe@rGO  | -0.51                              | 60.05                                  | 3431.08                                            | 5.71                                     |
| PdFe/SnFeP@rGO | -0.57                              | 88.65                                  | 7135.79                                            | 8.04                                     |
| Pd/SnFeP@rGO   | -0.52                              | 68.32                                  | 4228.40                                            | 6.18                                     |
| PdFe/rGO       | -0.51                              | 59.74                                  | 2746.56                                            | 4.59                                     |
| Pd/rGO         | -0.48                              | 42.89                                  | 945.21                                             | 2.20                                     |
| Pd/C           | -0.42                              | 31.47                                  | 413.16                                             | 1.31                                     |

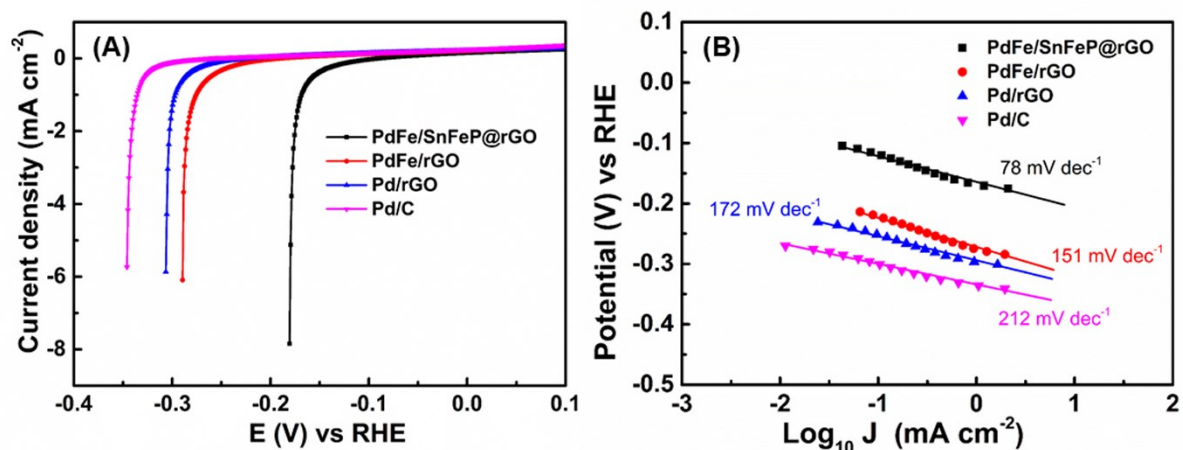

**Fig. S9.** (A) LSV and, (B) Tafel plot of PdFe/SnFeP@rGO, PdFe/rGO, Pd/rGO, and Pd/C catalyst in 0.5 M KOH. The LSV data were measured at rotating rate 1600 rpm at 2 mV s<sup>-1</sup> for the electrode at 25 °C. The electrochemical test was performed by continuous passing of N<sub>2</sub> in the alkaline media.

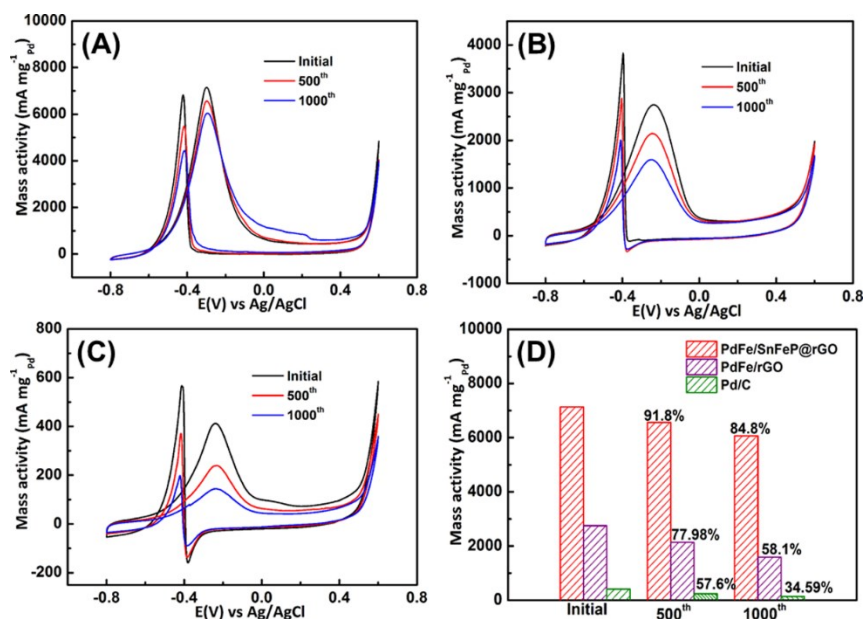

**Fig. S10.** EOR long-term cycling tests: CV peaks for (A) PdFe/SnFeP@rGO, (B) PdFe/rGO, (C) Pd/C, (D) Percentage of the oxidation peaks current of the 1000 cycles compared to initial cycles using a scan rate of 10 mVs<sup>-1</sup> in 0.5 M KOH and 0.3 M ethanol aqueous solution.



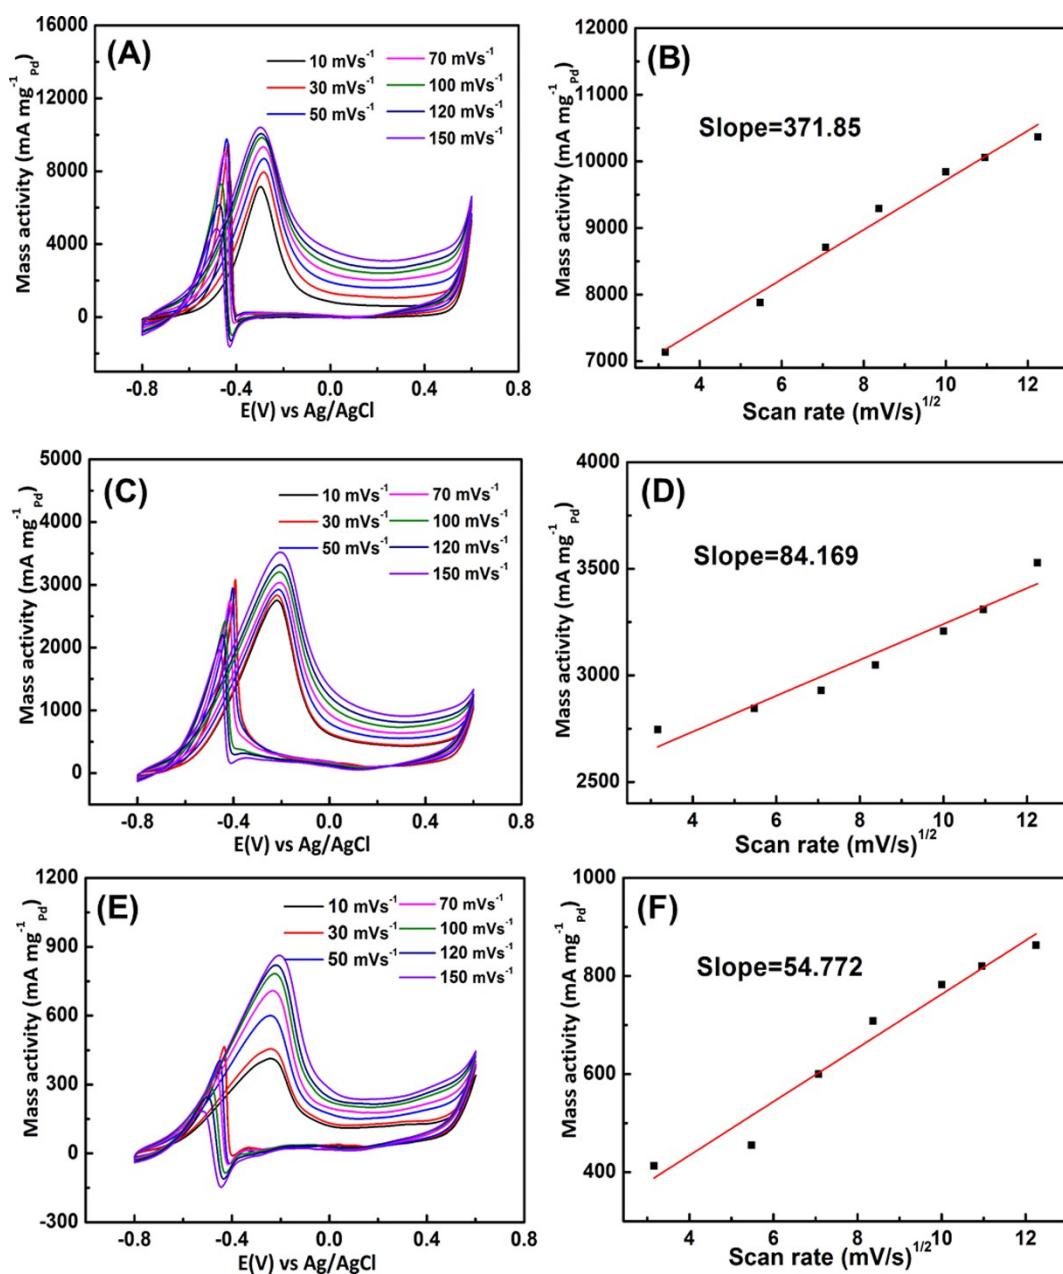

**Fig. S11.** CV peaks of (A) PdFe/SnFeP@rGO, (C) PdFe/rGO, and (E) Pd/C anode catalysts in 0.5 M KOH and 0.3 M ethanol with different scan rates. (B, D and F) curves of the mass activity vs. square roots of the various scan rate, respectively.

**Table ST4.** Comparison of electrochemical performance of Pd-based anode catalysts in alkaline medium.

| Catalysts                                         | Electrolyte                   | Mass activity                          | Ref.       |
|---------------------------------------------------|-------------------------------|----------------------------------------|------------|
| <b>Ultrathin Pd<sub>2</sub>Ag<sub>1</sub> NWs</b> | 1.0 M KOH +<br>1.0 M Ethanol  | 2.84 A mg <sub>Pd</sub> <sup>-1</sup>  | [1]        |
| <b>Pd-Ni-P</b>                                    | 1.0 M NaOH +<br>1.0 M Ethanol | 4.95 A mg <sub>Pd</sub> <sup>-1</sup>  | [2]        |
| <b>PdP<sub>2</sub>/rGO</b>                        | 0.5 M KOH +<br>0.5 M Ethanol  | 1.60 A mg <sub>Pd</sub> <sup>-1</sup>  | [3]        |
| <b>CoP/RGO-Pd10</b>                               | 1.0 M KOH +<br>1.0 M Ethanol  | 4.597A mg <sub>Pd</sub> <sup>-1</sup>  | [4]        |
| <b>Pd<sub>2</sub>Sn:P/C</b>                       | 0.5 M KOH +<br>0.5 M Ethanol  | 5.02 A mg <sub>Pd</sub> <sup>-1</sup>  | [5]        |
| <b>Pd/AG-BP</b>                                   | 1.0 M NaOH +<br>1.0 M Ethanol | 6.000 A mg <sub>Pd</sub> <sup>-1</sup> | [6]        |
| <b>Pd<sub>3</sub>NiP/N-rGO</b>                    | 1.0 M KOH +<br>1.0 M Ethanol  | 2.223 A mg <sub>Pd</sub> <sup>-1</sup> | [7]        |
| <b>c-Pd-Ni-P@a-Pd-Ni-P</b>                        | 1.0 M KOH +<br>1.0 M Ethanol  | 3.05 A mg <sub>Pd</sub> <sup>-1</sup>  | [8]        |
| <b>Pd-P/3DNGS</b>                                 | 1.0 M KOH +<br>1.0 M Ethanol  | 1.8 A mg <sub>Pd</sub> <sup>-1</sup>   | [9]        |
| <b>Pd@5%NP/VC</b>                                 | 0.5 M KOH +<br>0.5 M Ethanol  | 0.777 A mg <sub>Pd</sub> <sup>-1</sup> | [10]       |
| <b>PdFe/SnFeP@rGO</b>                             | 0.5 M KOH +<br>0.3 M Ethanol  | 7.135 A mg <sub>Pd</sub> <sup>-1</sup> | This study |

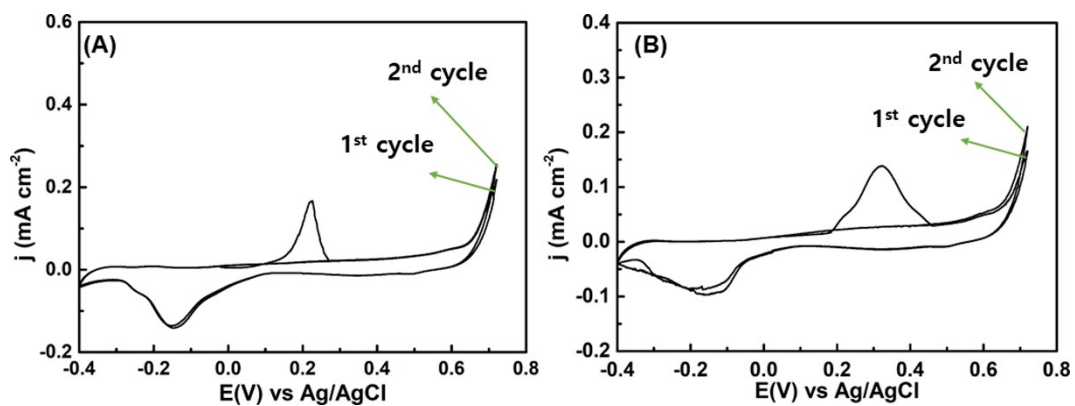

**Fig. S12.** CO stripping of (A) PdFe/SnFeP@rGO and (B) Pd/C in 0.1 M KOH. Potential scan rate of 10 mV S<sup>-1</sup> at 25 °C.

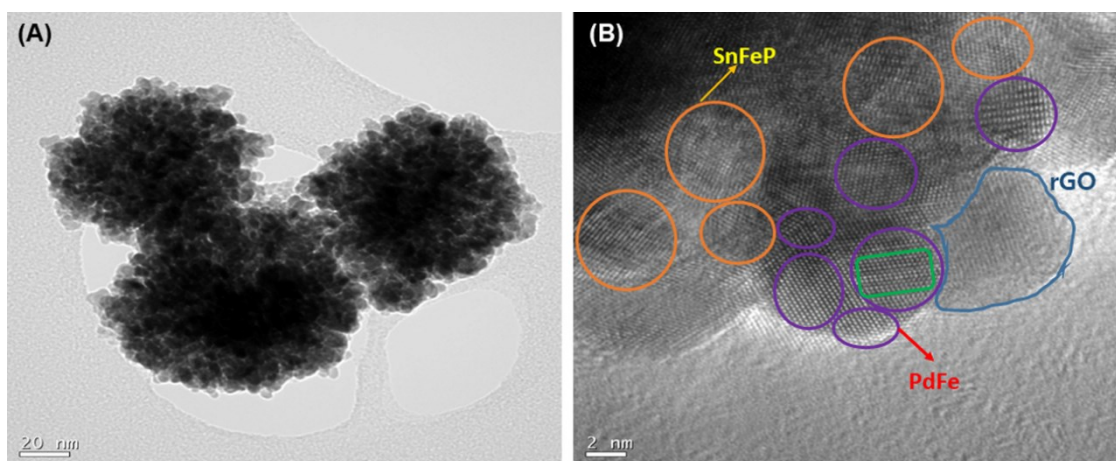

**Fig. S13.** TEM and HR-TEM of PdFe/SnFe@rGO catalyst after CO stripping test.

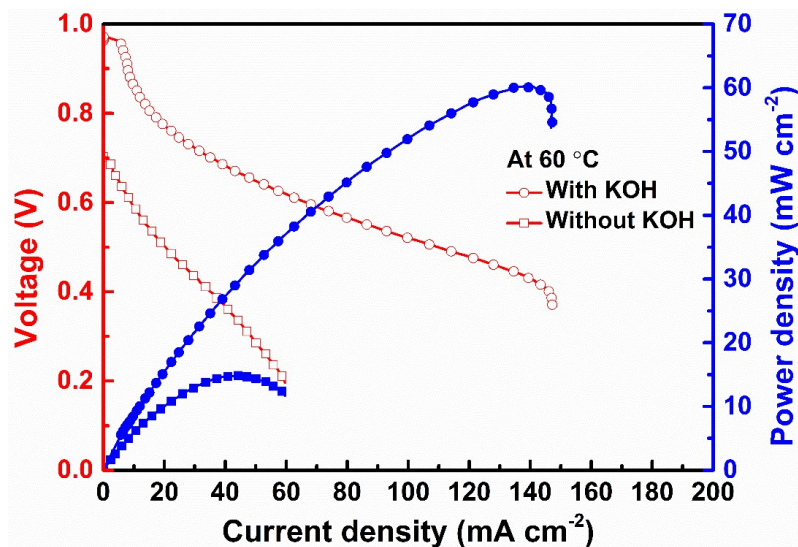

**Fig. S14.** Polarization curve of PdFe/SnFeP@rGO with and without 0.5 M KOH and 1.0 M ethanol at 60 °C.

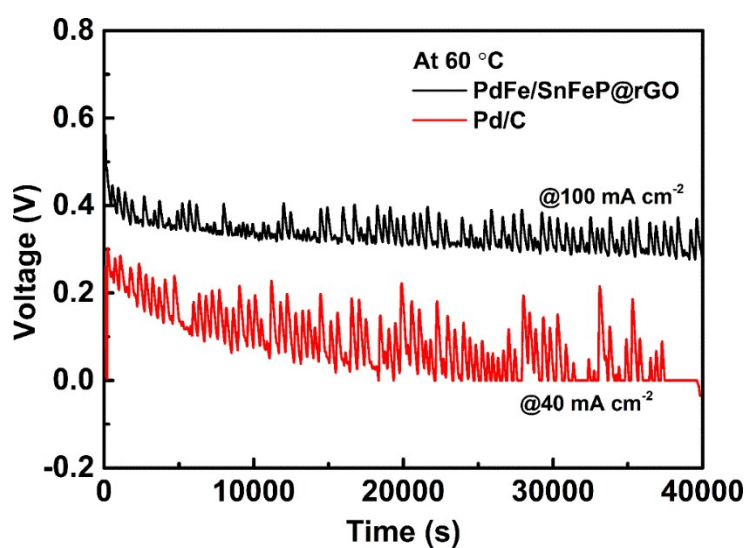

**Fig. S15.** Stability test of a PdFe/SnFeP@rGO cell at a constant load current density of 100 mA cm<sup>-2</sup> at 60 °C and Pd/C cell at a constant load current density of 40 mA cm<sup>-2</sup> at 60 °C with 0.5 M KOH and 1.0 M ethanol solution as fuel.

**Table ST5.** DEFCs performance with Pd based catalysts.

| <b>Anode catalysts</b>                                   | <b>Cathode catalysts</b>     | <b>Membrane</b> | <b>T °C</b> | <b>Fuel</b>                | <b>MPD (mW cm<sup>-2</sup>)</b> | <b>Ref.</b> |
|----------------------------------------------------------|------------------------------|-----------------|-------------|----------------------------|---------------------------------|-------------|
| <b>In<sub>3</sub>Pd<sub>2</sub></b>                      | Pt/C                         | Nafion 115      | 70          | 1 M ethanol<br>+ 1 M KOH   | 6.7                             | [11]        |
| <b>Pd<sub>89.3</sub>Au<sub>10.7</sub></b>                | Pt/C                         | AEM (A201)      | 40          | 1 M ethanol<br>+ 1 M KOH   | 31.5                            | [12]        |
| <b>Pd<sub>1</sub>Sn<sub>3</sub>/Vulcan XC-72</b>         | Pt/C                         | Nafion 117      | 80          | 2 M ethanol<br>+ 1 M KOH   | 42                              | [13]        |
| <b>Pd<sub>2</sub>Ru/C</b>                                | MnO <sub>2</sub><br>nano-rod | Tokuyama A201   | 60          | 2 M ethanol<br>+ 1 M KOH   | 38.9                            | [14]        |
| <b>Pd<sub>1</sub>Nb<sub>1</sub>/C</b>                    | Pt/C                         | Nafion 117      | 70          | 2 M ethanol<br>+ 1 M KOH   | 27                              | [15]        |
| <b>Pt<sub>36</sub>Pd<sub>41</sub>Cu<sub>23</sub> NWs</b> | Pt/C                         | Nafion 115      | 80          | 2 M ethanol                | 21.7                            | [16]        |
| <b>PdSn(50:50)/C</b>                                     | Pt/C                         | Nafion 117      | 60          | 1 M ethanol<br>+ 1 M KOH   | 20                              | [17]        |
| <b>Pd<sub>7</sub>IrNi<sub>12</sub>/C</b>                 | Fe-Co<br>HTM K14             | Tokuyama A201   | 60          | 1 M ethanol<br>+1 M KOH    | 49                              | [18]        |
| <b>PdFe/SnFeP@r GO</b>                                   | Pt/C                         | Nafion 117      | 60          | 1 M ethanol<br>+ 0.5 M KOH | 60.24                           | This study  |

\*MPD = Maximum power density, T = Temperature, Ref = Reference,

DEFCs = Direct ethanol fuel cells.

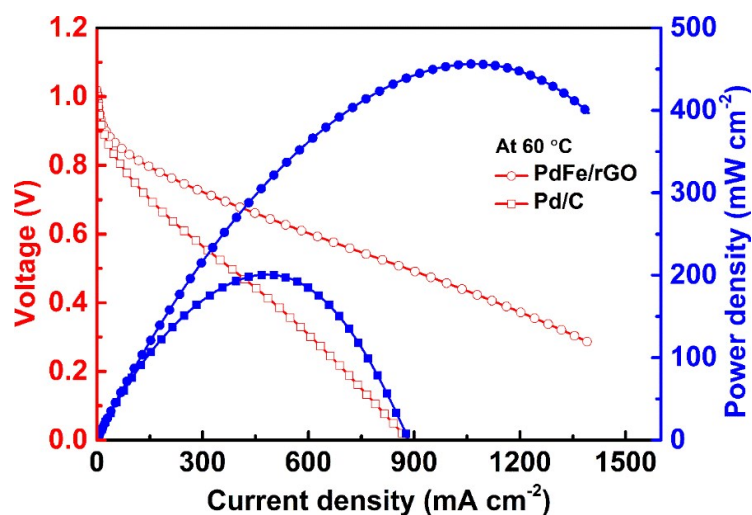

**Fig. S16.** Polarization curves of PdFe/rGO (30% Pd) and commercial Pd/C (40% Pd) in hydrogen gas at 60 °C.

**Table ST6.** Single cell performance of Pd based catalysts in hydrogen fuel.

| Anode catalysts                            | Cathode catalysts | Membrane   | T °C | Fuel/<br>Oxidant               | MPD<br>(mW<br>cm <sup>-2</sup> ) | Ref           |
|--------------------------------------------|-------------------|------------|------|--------------------------------|----------------------------------|---------------|
| Pd <sub>3</sub> Co/PCNT                    | Pt/C              | Nafion 212 | 60   | H <sub>2</sub> /O <sub>2</sub> | 327                              | [19]          |
| Pd <sub>0.33</sub> Ir <sub>0.67</sub> /N-C | Pt/C              | QASEBS     | 79   | H <sub>2</sub> /O <sub>2</sub> | 514                              | [20]          |
| Pd/C-CeO <sub>2</sub><br>(20 wt% Pd)       | Pt/C              | AEM        | 73   | H <sub>2</sub> /air            | 460                              | [21]          |
| Pd-Co/gCN                                  | Pt/C              | Nafion 212 | 60   | H <sub>2</sub> /O <sub>2</sub> | 290                              | [22]          |
| Pd/C-CeO <sub>2</sub>                      | Pt/C              | AEM        | 73   | H <sub>2</sub> /air            | 500                              | [23]          |
| Pd/Ni                                      | Ag alloy          | AEM        | 73   | H <sub>2</sub> /air            | 400                              | [24]          |
| PdFe/SnFeP<br>@rGO                         | Pt/C              | Nafion 117 | 60   | H <sub>2</sub> /O <sub>2</sub> | 857.54                           | This<br>study |

\*MPD = Maximum power density, T = Temperature, Ref = Reference

## References

- [1] H. Lv, Y. Wang, A. Lopes, D. Xu and B. Liu, Ultrathin PdAg single-crystalline nanowires enhance ethanol oxidation electrocatalysis. *Appl. Catal. B: Environ.*, 2019, **249**, 116–125. [doi.org/10.1016/j.apcatb.2019.02.068](https://doi.org/10.1016/j.apcatb.2019.02.068).
- [2] L. Chen, L. Lu, H. Zhu, Y. Chen, Y. Huang, Y. Li and L. Wang, Improved ethanol electrooxidation performance by shortening Pd–Ni active site distance in Pd–Ni–P nanocatalysts. *Nat. Commun.*, 2017, **8**,14136. [doi.org/10.1038/ncomms14136](https://doi.org/10.1038/ncomms14136).
- [3] J. Liu, Z. Luo, J. Li, X. Yu, J. Llorca, D. Nasiatou, J. Arbiol, M. Meyns and A. Cabot, Graphene-supported palladium phosphide PdP<sub>2</sub> nanocrystals for ethanol electrooxidation. *Appl. Catal. B: Environ.*, 2019, **242**, 258–266. [doi.org/10.1016/j.apcatb.2018.09.105](https://doi.org/10.1016/j.apcatb.2018.09.105).
- [4] M. Wang, R. Ding, Y. Xiao, H. Wang, L. Wang, C. M. Chen, Y. Mu, G. P. Wu and B. Lv, CoP/RGO-Pd hybrids with heterointerfaces as highly active catalysts for ethanol electrooxidation. *ACS Appl. Mater. Interfaces*, 2020, **12**, 28903–28914. [doi.org/10.1021/acsami.0c07703](https://doi.org/10.1021/acsami.0c07703)
- [5] X. Yu, J. Liu, J. Li, Z. Luo, Y. Zuo, C. Xing, J. Llorca, D. Nasiatou, J. Arbiol, K. Pan, T. Kleinhanns and Y. Xie, A. Cabot. Phosphorous incorporation in Pd<sub>2</sub>Sn alloys for electrocatalytic ethanol oxidation. *Nano Energy*, 2020, **77**, 105116. [doi.org/10.1016/j.nanoen.2020.105116](https://doi.org/10.1016/j.nanoen.2020.105116).
- [6] T. Wu, Y. Ma, Z. Qu, J. Fan, Q. Li, P. Shi, Q. Xu and Y. Min, Black phosphorus–graphene heterostructure-supported Pd nanoparticles with superior activity and stability for ethanol electro-oxidation. *ACS Appl. Mater. Interfaces*, 2019, **11**, 5136–5145. [doi.org/10.1021/acsami.8b20240](https://doi.org/10.1021/acsami.8b20240).
- [7] S. R. Chowdhury, T. Maiyalgan, S. K. Bhattachraya and A. Gayen, Influence of phosphorus on the electrocatalytic activity of palladium nickel nanoalloy supported on N-doped reduced graphene oxide for ethanol oxidation reaction. *Electrochim. Acta*, 2020, **342**, 136028. [doi.org/10.1016/j.electacta.2020.136028](https://doi.org/10.1016/j.electacta.2020.136028).
- [8] P. F. Yin, M. Zhou, J. Chen, C. Tan, G. Liu, Q. Ma, Q. Yun, X. Zhang, H. Cheng, Q. Lu, B. Chen, Y. Chen, Z. Zhang, J. Huang, D. Hu, J. Wang, Q. Liu, Z. Luo, Z. Liu, Y. Ge, X. J. Wu, X. W. Du and H. Zhang, Synthesis of palladium-based crystalline@amorphous core–shell nanoplates for highly efficient ethanol oxidation. *Adv. Mater.*, 2020, **32**, 2000482. [doi.org/10.1002/adma.202000482](https://doi.org/10.1002/adma.202000482).
- [9] H. Yang, S. Li, R. Jin, Z. Yu, G. Yang and J. Ma, Surface engineering of phosphorus low-doping palladium nanoalloys anchored on the three-dimensional nitrogen-doped graphene for enhancing ethanol electrooxidation. *Chem. Eng. J*, 2020, **389**, 124487. [doi.org/10.1016/j.cej.2020.124487](https://doi.org/10.1016/j.cej.2020.124487).
- [10] R. Kottayintavida and N. K. Gopalan, Nickel phosphate modified carbon supported Pd catalyst for enhanced alcohol electro oxidation. *Int. J. Hydrogen Energy*, 2020, **45**, 11116–11126. [doi.org/10.1016/j.ijhydene.2020.02.050](https://doi.org/10.1016/j.ijhydene.2020.02.050).

- [11] Y. J. Chen, Y. R. Chen, C. H. Chiang, K. L. Tung, T. K. Yeh and H. Y. Tuan, Monodisperse ordered indium-palladium nanoparticles: synthesis and role of indium for boosting superior electrocatalytic activity for ethanol oxidation reaction. *Nanoscale*, 2019, **11**, 3336–3343. [doi:10.1039/C8NR07342B](https://doi.org/10.1039/C8NR07342B).
- [12] A. S. Douk, H. Saravani, M. Z. Y. Abad and M. Noroozifar, Three-Dimensional engineering of nanoparticles to fabricate a Pd-Au aerogel as an advanced supportless electrocatalyst for low-temperature direct ethanol fuel cells. *ACS Appl. Energy Mater.*, 2020, **3**, 7527–7534. [doi.org/10.1021/acsaem.0c00928](https://doi.org/10.1021/acsaem.0c00928).
- [13] V. S. Pinheiro, F. M. Souza, T. C. Gentil, A. N. Nascimento, P. Bohnstedt, L. S. Parreira, E. C. Paz, P. Hammer, M. I. Sairre, B. L. Batista and M. C. Santos, Sn-containing electrocatalysts with a reduced amount of palladium for alkaline direct ethanol fuel cell applications. *Renew. Energy*, 2020, **158**, 49–63. [doi.org/10.1016/j.renene.2020.05.050](https://doi.org/10.1016/j.renene.2020.05.050).
- [14] J. Gua, R. Chen, F. C. Zhu, S. G. Sun and H. M. Villullas, New understandings of ethanol oxidation reaction mechanism on Pd/C and Pd<sub>2</sub>Ru/C catalysts in alkaline direct ethanol fuel cells. *Appl. Catal. B: Environ.*, 2018, **224**, 602–611. [doi.org/10.1016/j.apcatb.2017.10.037](https://doi.org/10.1016/j.apcatb.2017.10.037).
- [15] F. M. Souza, P. Bohnstedt, V. S. Pinheiro, L. A. Oliveira, B. L. Batista, L. S. Parreira and R. A. Antunes, M. C. Santos, Niobium increasing the electrocatalytic activity of palladium for alkaline direct ethanol fuel cell. *J. Electroanal. Chem.*, 2020, **858**, 113824. [doi.org/10.1016/j.jelechem.2020.113824](https://doi.org/10.1016/j.jelechem.2020.113824).
- [16] K. Wang, F. Wang, Y. Zhao and W. Zhang, Surface-tailored PtPdCu ultrathin nanowires as advanced electrocatalysts for ethanol oxidation and oxygen reduction reaction in direct ethanol fuel cell. *J. Energy Chem.*, 2021, **52**, 251–261 (2021). [doi.org/10.1016/j.jechem.2020.04.056](https://doi.org/10.1016/j.jechem.2020.04.056).
- [17] E. H. Fontes, C. E. D. Ramos, J. Nandenha, R. M. Piasentin, A. O. Neto and R. Landers, Structural analysis of PdRh/C and PdSn/C and its use as electrocatalysts for ethanol oxidation in alkaline medium. *Int. J. Hydrogen Energy*, 2019, **44**, 937–951. [doi.org/10.1016/j.ijhydene.2018.11.049](https://doi.org/10.1016/j.ijhydene.2018.11.049).
- [18] S. Shen, T. S. Zhao, J. Xu and Y. Li, High performance of a carbon supported ternary PdIrNi catalyst for ethanol electrooxidation in anion exchange membrane direct ethanol fuel cells. *Energy Environ. Sci.*, 2011, **4**, 1428–1433. [doi: 10.1039/C0EE00579G](https://doi.org/10.1039/C0EE00579G).
- [19] P. Chandran and S. Ramaprabhu, Catalytic performance of non-platinum-based hybride carbon hetero-structure for oxygen reduction and hydrogen oxidation reactions in proton exchange membrane fuel cell. *Int. J. Hydrogen Energy*, 2018, **43**, 18477–18487. [doi.org/10.1016/j.ijhydene.2018.08.066](https://doi.org/10.1016/j.ijhydene.2018.08.066).
- [20] Y. Cong, I. T. McCrum, X. Gao, Y. Lv, S. Miao, Z. Shao, B. Yi, H. Yu, M. J. Janik and Y. Song, Uniform Pd<sub>0.33</sub>Ir<sub>0.67</sub> nanoparticles supported on nitrogen-doped carbon with remarkable activity toward the alkaline hydrogen oxidation reaction. *J. Mater. Chem. A*, 2019, **7**, 3161–3169. [doi:10.1039/C8TA11019K](https://doi.org/10.1039/C8TA11019K).
- [21] H. A. Miller, F. Vizza, M. Marelli, A. Zadick, L. Dubau, M. Chatenet, S. Geiger, S. Cherevko, H. Doan, R. K. Pavlicek, S. Mukerjee and D. R. Dekel, Highly active nanostructured palladium-ceria electrocatalysts for the



hydrogen oxidation reaction in alkaline medium. *Nano Energy*, 2017, **33**, 293–305. [doi.org/10.1016/j.nanoen.2017.01.051](https://doi.org/10.1016/j.nanoen.2017.01.051).

[22] A. Ghosh, P. Chandran and S. Ramaprabhu, Palladium-nitrogen coordinated cobalt alloy towards hydrogen oxidation and oxygen reduction reactions with high catalytic activity in renewable energy generations of proton exchange membrane fuel cell. *Appl. Energy*, 2017, **208**, 37–48. [doi.org/10.1016/j.apenergy.2017.10.022](https://doi.org/10.1016/j.apenergy.2017.10.022).

[23] H. A. Miller, A. Lavacchi, F. Vizza, M. Marelli, F. D. Benedetto, F. D. Acapito, Y. Paska, M. Page and D. R. Dekel, Pd/C-CeO<sub>2</sub> Anode Catalyst for High-Performance Platinum-Free Anion Exchange Membrane Fuel Cells. *Angew. Chem. Int. Ed.*, 2016, **55**, 6004–6007. [doi.org/10.1002/anie.201600647](https://doi.org/10.1002/anie.201600647).

[24] M. Alesker, M. Page, M. Shviro, Y. Paska, G. Gershinsky, D. R. Dekel and D. Zitoun, Palladium/nickel bifunctional electrocatalyst for hydrogen oxidation reaction in alkaline membrane fuel cell. *J. Power Sources*, 2016, **304**, 332–339. [doi.org/10.1016/j.jpowsour.2015.11.026](https://doi.org/10.1016/j.jpowsour.2015.11.026).
